# Supplementary material for: First validation of high-resolution satellite-derived methane emissions from an active gas leak in the UK
Source: Copernicus journal article supplement (doi:10.5194/egusphere-2023-2246), 2023-10-12
Supplement: Supplementary file 1 [file egusphere-2023-2246-supplement.pdf]

## Supplemental Information

### Section S1. Gas leak site

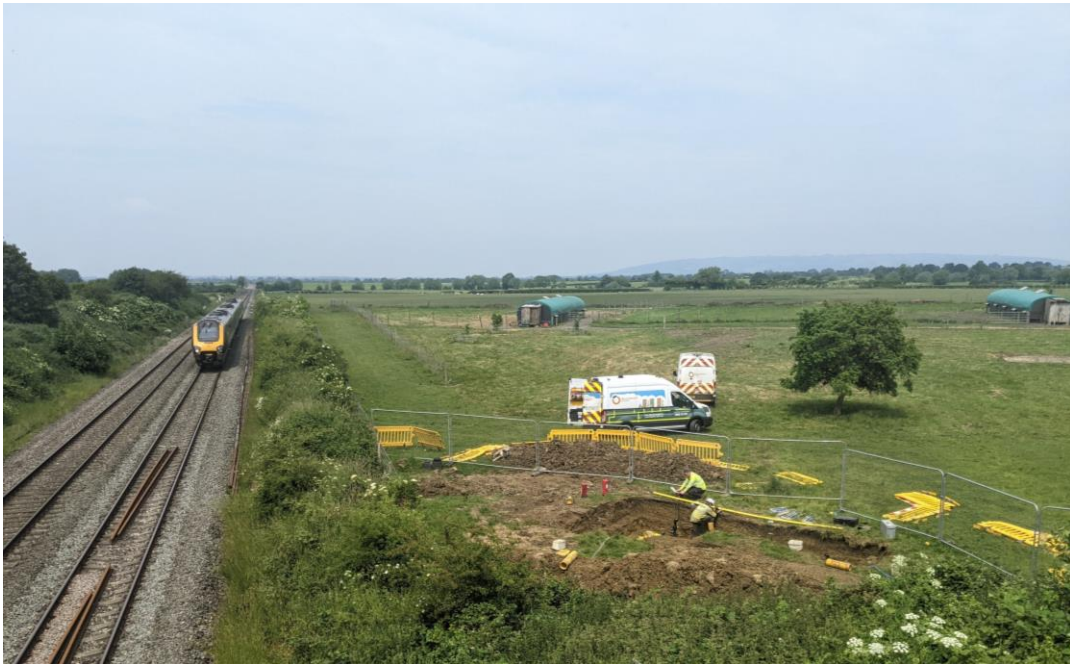

*Figure S1. Image of gas leak site works taken on 12<sup>th</sup> June 2023.*

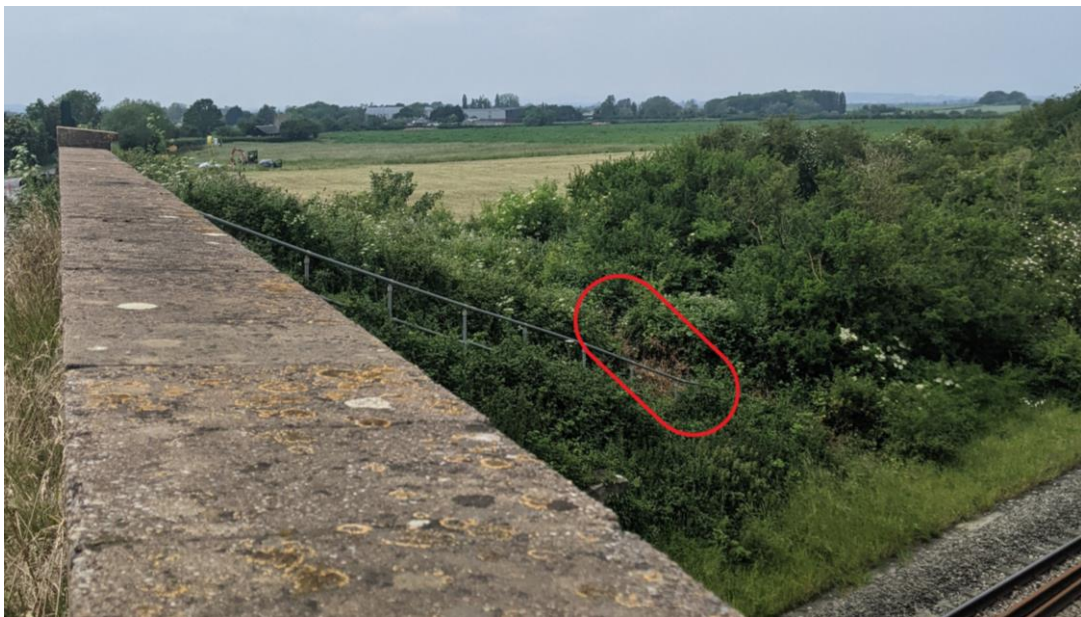

*Figure S2. Image of dead vegetation (circled in red) at gas leak site taken on 12<sup>th</sup> June 2023.*

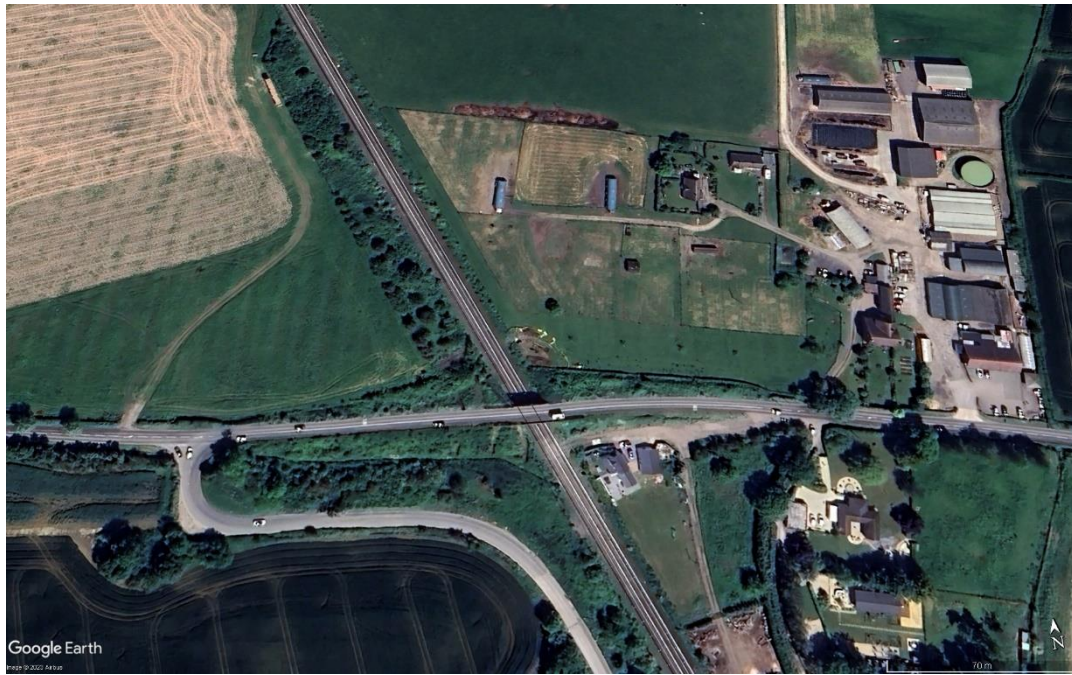

Figure S3. Google Earth Image (Airbus 2023) of the gas leak site taken in June 2023 (Google and Airbus, 2023), showing works being done on the west site of the railway line.

## Section S2. Mobile Survey

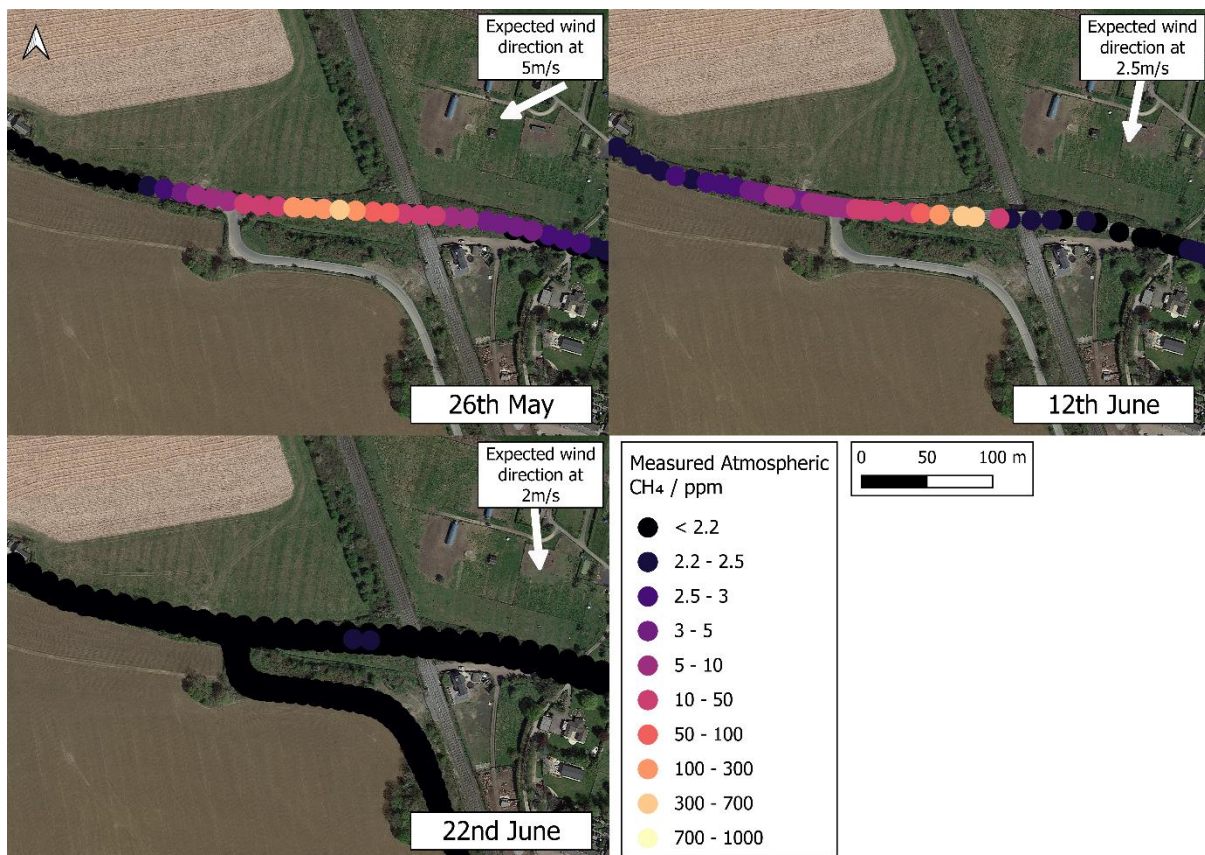

Figure S4. Median observed concentrations (ppb) during the ground-based mobile surveys. © 2023 Google

### Section S3. NAME Plume Modelling

We tested different plume criteria for scaling NAME to estimate the flux of the leak from the satellite. Here are the different flux estimates from the different plume criteria.

Table S1. Comparison between the mobile survey- and GHGSat-derived fluxes ( $\text{kg h}^{-1}$ ) against the equivalent fluxes derived in NAME ( $\text{kg h}^{-1}$ ) with the release location moved by  $\sim 10\text{m}$  in N/S/E/W directions. The NAME-derived fluxes are shown with the estimation bounds in brackets.

| Date       | GHGSat Flux ( $\text{kg h}^{-1}$ ) | NAME Derived Flux ( $\text{kg h}^{-1}$ ) | NAME Flux North ( $\text{kg h}^{-1}$ ) | NAME Flux South ( $\text{kg h}^{-1}$ ) | NAME Flux East ( $\text{kg h}^{-1}$ ) | NAME Flux West ( $\text{kg h}^{-1}$ ) |
|------------|------------------------------------|------------------------------------------|----------------------------------------|----------------------------------------|---------------------------------------|---------------------------------------|
| 27/03/2023 | 236 $\pm$ 157                      | 181<br>[133, 322]                        | 199<br>[132,294]                       | 206<br>[132,296]                       | 202<br>[134,314]                      | 208<br>[132,290]                      |
| 20/04/2023 | 1071 $\pm$ 310                     | 745<br>[539, 1376]                       | 732<br>[650,1808]                      | 769<br>[559,1813]                      | 724<br>[559,1782]                     | 776<br>[560,1868]                     |
| 20/05/2023 | 1375 $\pm$ 481                     | 1243<br>[931, 2322]                      | 1462<br>[977,3128]                     | 1498<br>[973,3128]                     | 1455<br>[971,3018]                    | 1444<br>[979,3123]                    |
| 22/05/2023 | 438 $\pm$ 215                      | 384<br>[173, 292]                        | 398<br>[177,395]                       | 432<br>[177, 397]                      | 392<br>[177,396]                      | 432<br>[177,403]                      |
| 07/06/2023 | 290 $\pm$ 131                      | 204<br>[77, 244]                         | 212<br>[77,231]                        | 210<br>[76,226]                        | 211<br>[75,208]                       | 229<br>[76,228]                       |

Table S2. Wind speeds ( $\text{ms}^{-1}$ ) used in flux estimations.

| Date       | GEOS FP Wind Speed ( $\text{ms}^{-1}$ ) | UKV Wind Speed ( $\text{ms}^{-1}$ ) |
|------------|-----------------------------------------|-------------------------------------|
| 27/03/2023 | 0.8                                     | 3.8                                 |
| 20/04/2023 | 7.3                                     | 12.0                                |
| 20/05/2023 | 4.9                                     | 7.3                                 |
| 22/05/2023 | 5.3                                     | 8.6                                 |
| 26/05/2023 | -                                       | 4.4                                 |
| 07/06/2023 | 3.7                                     | 5.8                                 |
| 12/06/2023 | -                                       | 3.1                                 |

### Section S3. Modelled Concentrations at Ridge Hill

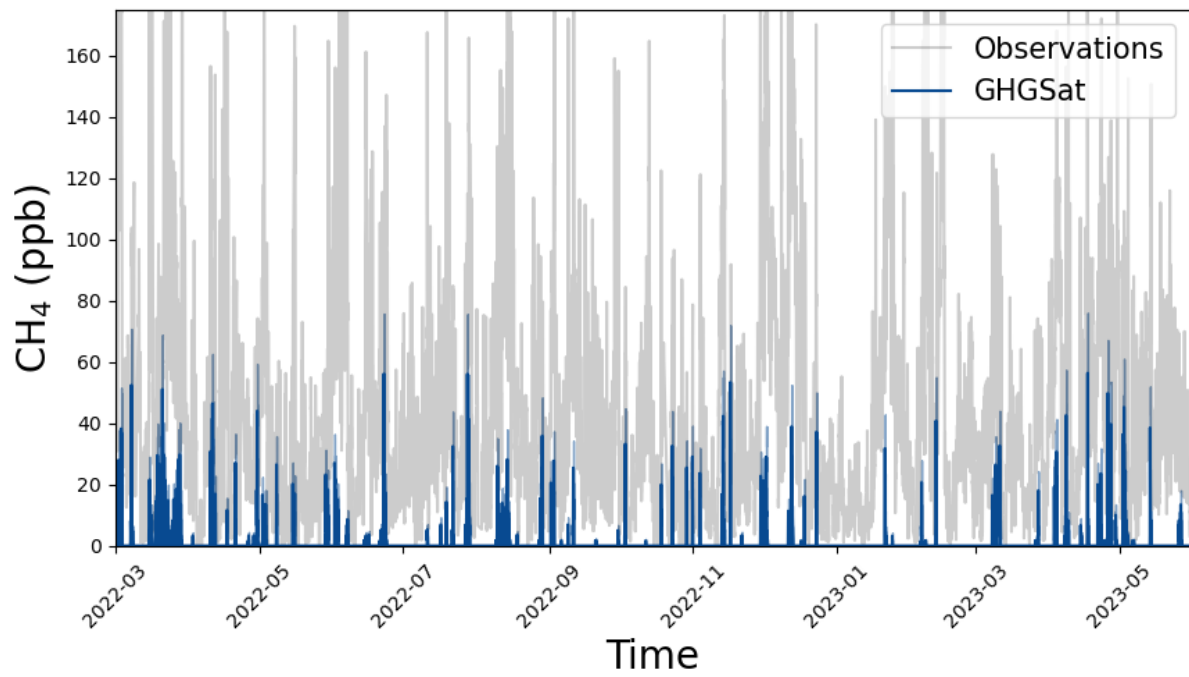

Figure S5. The NAME\_long modelled concentrations at Ridge Hill from GHGSat derived flux rates (ppb, blue) and above-background concentrations at RGL (ppb, grey).
